# Supplementary material for: The Effect of Blood Lipids on the Left Ventricle: A Mendelian Randomization Study
Source: PubMed Central journal article supplement (PMC7613249; doi:10.1016/j.jacc.2020.09.583), 2020-11-24
Supplement: EMS151235-supplement-Appendix.pdf [file EMS151235-supplement-Appendix.pdf]

---

**APPENDIX** For supplemental tables and figures, please see the online version of this paper.
